# Supplementary material for: Controlled Environment Agriculture Could Mitigate Energy-Food-Climate Trade-off Under Confluent Conditions
Source: Research Square preprint supplement (doi:10.21203/rs.3.rs-5121899/v1), 2025-04-14
Supplement: Supplementary file 2 [file 948ddccff9a93843a7f6eaac.xlsx]

## Sheet: Lettuce_Full Data
Importing Country	Maximum Energy Use-Productivity Metric (kWh/ kg)
PRY	19.4875
ETH	14.1684
COG	7.91312
URY	7.65659
COD	6.70749
NOR	5.14654
CHE	5.00133
KGZ	4.78537
SWE	3.85722
CMR	3.46377
ISL	3.08602
CRI	2.94598
FRA	2.4133
BRA	2.3666
ZMB	2.29728
CAN	2.008
KEN	1.51412
NPL	1.44714
USA	1.31156
AGO	1.29276
GEO	1.2352
MEX	1.13662
ARM	0.937184
BEL	0.751373
PAK	0.74785
GAB	0.731315
VNM	0.715952
ESP	0.696349
AUT	0.688549
CHL	0.686983
JPN	0.673906
MNG	0.623292
KOR	0.599465
NGA	0.599411
KAZ	0.584069
SGP	0.550592
TWN	0.543946
AZE	0.541249
OMN	0.530782
RUS	0.516372
DNK	0.511527
AUS	0.504707
ARE	0.503252
SVK	0.498463
MOZ	0.483784
HUN	0.480684
DEU	0.472869
BGD	0.45996
BHR	0.455317
NER	0.453292
BLR	0.443045
THA	0.433695
QAT	0.433154
IRN	0.430663
GBR	0.426812
JOR	0.42007
HKG	0.4148
GHA	0.412344
ALB	0.40645
PAN	0.406013
CIV	0.395869
ROU	0.393276
KHM	0.390327
FIN	0.387768
BEN	0.377258
TUR	0.366825
BGR	0.366703
MUS	0.365145
TZA	0.358281
NLD	0.34944
TGO	0.34446
ZWE	0.332233
LUX	0.330299
MDA	0.319989
MYS	0.309777
KWT	0.299044
ITA	0.290287
PHL	0.28689
SAU	0.284444
UKR	0.281421
CZE	0.281098
SVN	0.278526
ZAF	0.277659
HRV	0.270368
BRN	0.267758
MLT	0.266314
TTO	0.260831
SLV	0.25168
HND	0.241378
IRL	0.237242
GTM	0.236507
ISR	0.232732
PRT	0.231825
DOM	0.230517
NIC	0.225648
JAM	0.222352
LVA	0.203963
POL	0.192698
BWA	0.188179
BIH	0.186776
IDN	0.186091
MNE	0.184668
LTU	0.184252
LBN	0.171033
SRB	0.170515
MKD	0.158959
MAR	0.14749
SEN	0.144278
YEM	0.133461
GRC	0.128675
EST	0.117555
SYR	0.111252
CYP	0.0646107
LBY	0.041256

## Sheet: Tomato_Full Data
Importing Country	Maximum Energy Use-Productivity Metric (kWh/ kg)
PRY	17.7422
ETH	13.907
COG	7.59925
COD	7.37298
URY	5.98429
NOR	5.34888
CHE	5.34106
KGZ	4.57369
SWE	4.35203
TJK	3.89031
CMR	3.32841
FRA	2.57485
BRA	2.3666
ISL	2.35862
ZMB	2.26
CAN	1.9898
CRI	1.81317
NZL	1.64276
NPL	1.44714
BOL	1.30205
USA	1.26094
KEN	1.25952
GEO	1.2352
AGO	1.21063
TWN	1.18124
ARM	0.937184
JPN	0.878303
PAK	0.733712
VNM	0.703615
ESP	0.696349
GAB	0.690238
MNG	0.65328
ALB	0.626434
BEL	0.623692
AUT	0.619645
VEN	0.57573
RUS	0.570904
NGA	0.551866
KAZ	0.532534
IRN	0.530729
SGP	0.528974
DNK	0.523327
ARE	0.515698
GBR	0.513608
MOZ	0.499336
OMN	0.490558
CHL	0.477344
BGD	0.465051
BHR	0.461238
HUN	0.457047
QAT	0.440815
BLR	0.437279
SVK	0.436141
DEU	0.426175
NER	0.4189
HKG	0.4148
PAN	0.406013
CIV	0.395869
FIN	0.387768
THA	0.385511
AZE	0.385145
JOR	0.367731
BGR	0.358569
NLD	0.341344
KHM	0.336462
ZWE	0.332233
LUX	0.330493
TZA	0.315254
CZE	0.314885
ROU	0.314686
IRL	0.312251
MYS	0.304215
LVA	0.301794
TUR	0.299134
KWT	0.299044
ZAF	0.295516
SLV	0.290013
HND	0.289592
LKA	0.289288
ITA	0.280642
SVN	0.278526
HRV	0.278191
SAU	0.276453
TGO	0.26966
LTU	0.2693
MLT	0.266314
PRT	0.262906
TTO	0.257196
BRN	0.256526
EGY	0.247268
UKR	0.243709
POL	0.242337
MDA	0.237104
GTM	0.226558
NIC	0.225648
JAM	0.222352
BEN	0.222093
IDN	0.213555
LBN	0.167923
BWA	0.166835
ISR	0.146731
CUB	0.143546
EST	0.142757
MNE	0.140179
GRC	0.128505
BIH	0.119971
SRB	0.10772
MKD	0.0922847
SYR	0.0832705
LBY	0.0821867
TUN	0.0647544
CYP	0.0525467

## Sheet: Strawberry_Full Data
Importing Country	Maximum Energy Use-Productivity Metric (kWh/ kg)
COD	129.555
COG	110.058
ETH	94.4149
NZL	69.9542
NOR	64.7509
CMR	52.1269
ISL	51.3403
PRY	49.3384
CRI	39.2427
CHE	33.3098
SWE	30.567
CAN	23.7047
ZMB	20.5913
AGO	16.7784
MMR	16.1183
KEN	15.8641
FRA	14.2266
SGP	13.9463
JPN	12.4952
USA	10.8643
MOZ	10.5233
BRN	9.94004
GAB	9.38697
PHL	9.14137
MUS	8.71319
HKG	8.38546
KHM	8.2127
AUS	8.18
THA	7.97236
GEO	7.79744
MYS	7.44463
GHA	7.1309
QAT	6.77072
BHR	6.75574
CIV	6.75507
ARE	6.45943
GBR	6.45163
NGA	6.23616
ESP	5.57889
BEL	5.57137
PAN	5.4364
TZA	5.3367
NPL	5.25514
IDN	5.15364
OMN	5.10765
KGZ	5.07224
DOM	5.00692
TTO	4.88152
AZE	4.47408
PRT	4.39694
GTM	4.37181
KWT	4.1046
FIN	4.08316
IRL	4.07213
DNK	3.849
MNG	3.73788
ARM	3.71933
MEX	3.62678
NER	3.61041
SAU	3.43482
BGD	3.37091
SEN	3.35056
IND	3.28715
VNM	3.25322
ALB	3.12827
KAZ	3.1193
MLT	3.08976
ZAF	3.02346
RUS	3.009
UKR	2.94095
BLR	2.68459
ITA	2.58211
NLD	2.52987
LBN	2.4912
AUT	2.47142
TWN	2.27437
LTU	2.19187
TUR	2.15887
MDA	2.14614
DEU	2.07337
LVA	2.05481
LUX	2.05392
BGR	2.0324
JAM	2.00422
GRC	1.98525
ROU	1.82522
MAR	1.681
YEM	1.64753
SVK	1.61656
CYP	1.60879
HUN	1.5588
SVN	1.55673
LBY	1.47755
EST	1.31589
NIC	1.309
SLV	1.28319
HRV	1.16162
SRB	0.947065
CZE	0.915369
POL	0.913482
BIH	0.863669
MNE	0.638819
MKD	0.627703
HND	0.550245
SYR	0.534851
BWA	0.397103

## Sheet: Wheat_Full Data
	Importing Country	Maximum Energy Use-Productivity Metric (kWh/ kg)
138	PRY	15.9145
13	ETH	9.79777
30	COG	8.62999
45	URY	7.62654
31	COD	7.30344
155	CAN	6.05102
28	CRI	5.42829
69	ARM	5.11918
91	CHE	4.9739
53	SWE	3.26065
146	CMR	3.19315
52	NOR	3.00899
42	TJK	2.86529
154	USA	2.8174
47	RUS	2.40738
44	BRA	2.29715
136	ECU	2.25694
21	FRA	2.14896
63	AZE	2.1328
80	ZMB	1.79341
41	KAZ	1.79068
116	SLV	1.69507
68	KGZ	1.683
60	GEO	1.64447
4	PER	1.6381
137	COL	1.56935
62	ALB	1.56585
46	MNG	1.50635
178	NZL	1.41713
3	BOL	1.40148
16	KEN	1.3638
144	NPL	1.35777
101	AGO	1.33426
117	GTM	1.22846
156	MEX	1.16047
188	JPN	1.10115
5	ARG	0.994772
158	PAN	0.990453
126	MMR	0.960328
127	BGD	0.948332
187	TWN	0.904119
190	ISL	0.859077
166	HKG	0.81351
229	SGP	0.807192
55	VNM	0.756062
9	CHN	0.734597
24	KOR	0.70777
59	BEL	0.67157
66	ESP	0.668932
99	NGA	0.637935
2	CHL	0.607015
29	NIC	0.597133
92	IRN	0.571197
108	PAK	0.567663
135	HND	0.56705
182	LKA	0.552316
54	FIN	0.541436
181	PHL	0.532861
197	TTO	0.526035
159	VEN	0.517219
39	OMN	0.511207
110	THA	0.51056
147	GAB	0.502638
58	ARE	0.483975
34	BLR	0.477514
65	TUR	0.435093
78	GBR	0.421415
150	TGO	0.417444
122	MOZ	0.414313
151	GHA	0.409824
107	ZWE	0.404823
1	MYS	0.40135
57	LUX	0.372316
90	ITA	0.37134
212	JAM	0.369969
104	QAT	0.36944
95	CIV	0.354002
49	DEU	0.35209
70	DNK	0.341494
148	NER	0.339616
18	TZA	0.337282
100	BEN	0.335585
248	BHR	0.318657
140	PRT	0.316121
113	DOM	0.304827
221	MLT	0.295401
109	BGR	0.294212
0	IDN	0.291306
36	ZAF	0.278614
102	HRV	0.276671
162	YEM	0.275398
73	ROU	0.267864
121	DZA	0.256824
105	SAU	0.25603
56	KHM	0.254444
8	IND	0.25245
161	EGY	0.251425
115	KWT	0.248663
103	SVN	0.248065
88	AUT	0.245257
143	JOR	0.244804
93	NLD	0.241411
119	BRN	0.240426
175	AUS	0.232391
33	UKR	0.22318
217	MUS	0.197048
75	SVK	0.192386
76	POL	0.186154
10	ISR	0.182728
106	BWA	0.182294
98	SEN	0.180509
26	MAR	0.178926
48	CZE	0.169985
141	MDA	0.169469
79	GRC	0.162883
12	LBN	0.138116
134	CUB	0.135855
43	LTU	0.131202
72	TUN	0.128574
19	SYR	0.120752
74	HUN	0.118174
131	BIH	0.116072
71	LBY	0.112644
77	IRL	0.112397
7	CYP	0.100047
96	SRB	0.0937516
130	MNE	0.0911911
51	LVA	0.0861468
61	MKD	0.0672723
50	EST	0.0442162

## Sheet: Soybean_Full Data
	Importing Country	Maximum Energy Use-Productivity Metric (kWh/ kg)
138	PRY	17.6143
13	ETH	12.505
45	URY	7.67563
31	COD	7.41653
30	COG	7.37215
52	NOR	7.19165
28	CRI	6.88218
155	CAN	6.09603
53	SWE	5.44137
91	CHE	4.87576
178	NZL	4.44889
21	FRA	4.31499
190	ISL	3.72512
42	TJK	2.87984
146	CMR	2.33194
144	NPL	2.32593
68	KGZ	2.18509
154	USA	2.08119
4	PER	2.03617
44	BRA	1.95136
137	COL	1.91719
41	KAZ	1.7625
136	ECU	1.63096
126	MMR	1.49851
46	MNG	1.45307
3	BOL	1.40095
229	SGP	1.35867
66	ESP	1.35068
117	GTM	1.26887
101	AGO	1.21488
69	ARM	1.19892
188	JPN	1.17602
55	VNM	1.12257
5	ARG	1.11791
156	MEX	1.08782
16	KEN	1.05774
158	PAN	0.989516
59	BEL	0.988752
116	SLV	0.971145
78	GBR	0.95031
127	BGD	0.934365
108	PAK	0.934107
24	KOR	0.867351
99	NGA	0.855306
119	BRN	0.811694
187	TWN	0.810888
54	FIN	0.808237
181	PHL	0.798845
56	KHM	0.783459
166	HKG	0.78164
140	PRT	0.768205
80	ZMB	0.750566
9	CHN	0.734462
1	MYS	0.694521
47	RUS	0.676872
159	VEN	0.6768
93	NLD	0.66592
63	AZE	0.657324
49	DEU	0.645051
92	IRN	0.641506
29	NIC	0.640399
90	ITA	0.629837
143	JOR	0.624508
70	DNK	0.623544
0	IDN	0.623457
2	CHL	0.612323
110	THA	0.57973
73	ROU	0.565005
62	ALB	0.521369
197	TTO	0.521331
65	TUR	0.483891
161	EGY	0.480521
58	ARE	0.474107
72	TUN	0.452425
105	SAU	0.423379
175	AUS	0.419868
10	ISR	0.419109
121	DZA	0.406206
26	MAR	0.40288
248	BHR	0.385231
60	GEO	0.380439
113	DOM	0.374107
122	MOZ	0.358224
18	TZA	0.352702
77	IRL	0.34804
95	CIV	0.333396
57	LUX	0.331031
39	OMN	0.328954
33	UKR	0.3234
36	ZAF	0.310252
217	MUS	0.304662
148	NER	0.30393
134	CUB	0.288901
88	AUT	0.287443
79	GRC	0.276161
12	LBN	0.274835
182	LKA	0.273205
212	JAM	0.271805
104	QAT	0.269061
151	GHA	0.267951
135	HND	0.24097
74	HUN	0.234066
8	IND	0.230958
147	GAB	0.22797
48	CZE	0.218559
34	BLR	0.21649
115	KWT	0.215093
102	HRV	0.214899
103	SVN	0.211989
109	BGR	0.211954
43	LTU	0.202191
98	SEN	0.195947
162	YEM	0.19341
106	BWA	0.185674
107	ZWE	0.184405
150	TGO	0.176994
141	MDA	0.149554
76	POL	0.134264
19	SYR	0.120791
100	BEN	0.114119
75	SVK	0.110121
221	MLT	0.104706
96	SRB	0.096289
130	MNE	0.0907925
131	BIH	0.0857108
7	CYP	0.0749605
51	LVA	0.0663497
61	MKD	0.0599991
50	EST	0.0505357
71	LBY	0.041974
